# Supplementary material for: Assessing multi-variable coupling effects of UV illumination, heat and oxygen on porous ZnO nanocrystalline film through electron concentration and mobility extraction
Source: Royal Society of Chemistry journal article supplement (doi:10.1039/c5cp02391b), 2015-01-01

## Supplementary Information

### Assessing Multi-variable Coupling Effects of UV Illumination, Heat and Oxygen on Porous ZnO Nanocrystalline Film through Electron Concentration and Mobility Extraction

*Shasha Zhang, Changsheng Xie\*, Guozhu Zhang, Qiang Zhu, Shunping Zhang*

State Key Laboratory of Material Processing and Die & Mould Technology,  
Nanomaterials and Smart Sensors Research Laboratory, Department of Materials  
Science and Engineering, Huazhong University of Science and Technology, Wuhan  
430074, PR China

---

\* Corresponding author. Tel: +86-27-8755-9836. Fax: +86-27-8754-3778.

*E-mail addresses:* [csxie@mail.hust.edu.cn](mailto:csxie@mail.hust.edu.cn) (Changsheng Xie).

**Figure S1.** XRD pattern of the as-prepared porous nanocrystalline ZnO film.

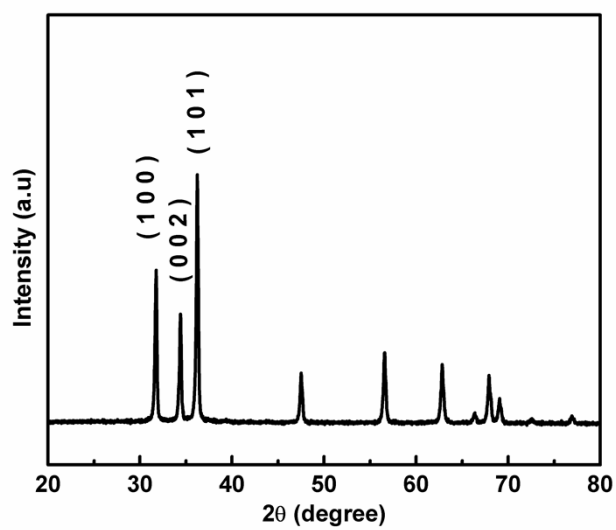

**Figure S2.** The fitted curves (the black dashed lines) of different oxygen concentration in the dark at low temperature (a) and at high temperature (b).

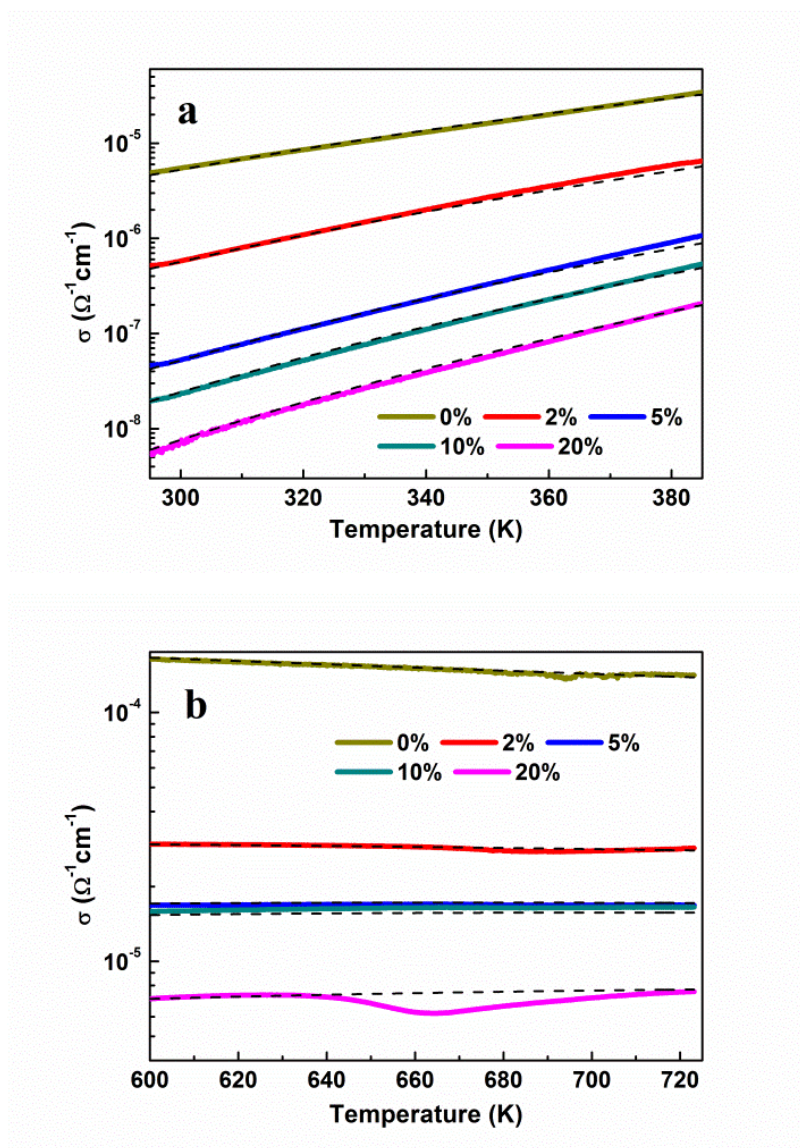

**Figure S3.** (a) The PL spectra of the ZnO samples under different temperature; (b) the PL spectra are deconvoluted by Gaussian fitting, and the Area IntgP of each Gaussian function is present in the insert table. The  $\sim 470\text{nm}$  emission may be attributed to the transition between  $V_{\text{O}}^{\bullet}$  to VB (the valence band); the  $\sim 530\text{nm}$  emission may be related to the Zn vacancy; the  $\sim 590\text{nm}$  emission is believed to be originated from the  $V_{\text{O}}^{\bullet\bullet}$ ; and the  $\sim 660\text{ nm}$  emission is commonly attributed to the presence of excess oxygen.

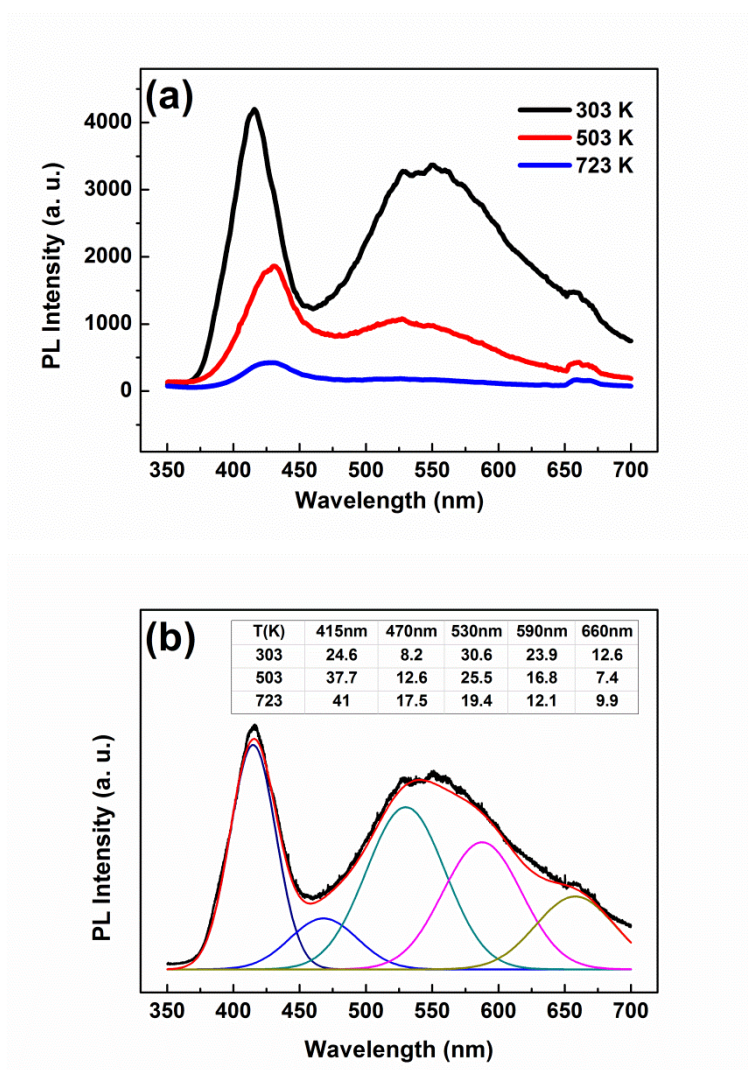

**Figure S4.** The fitted curves of different oxygen concentration under the UV light at low temperature (a) and at high temperature (b).

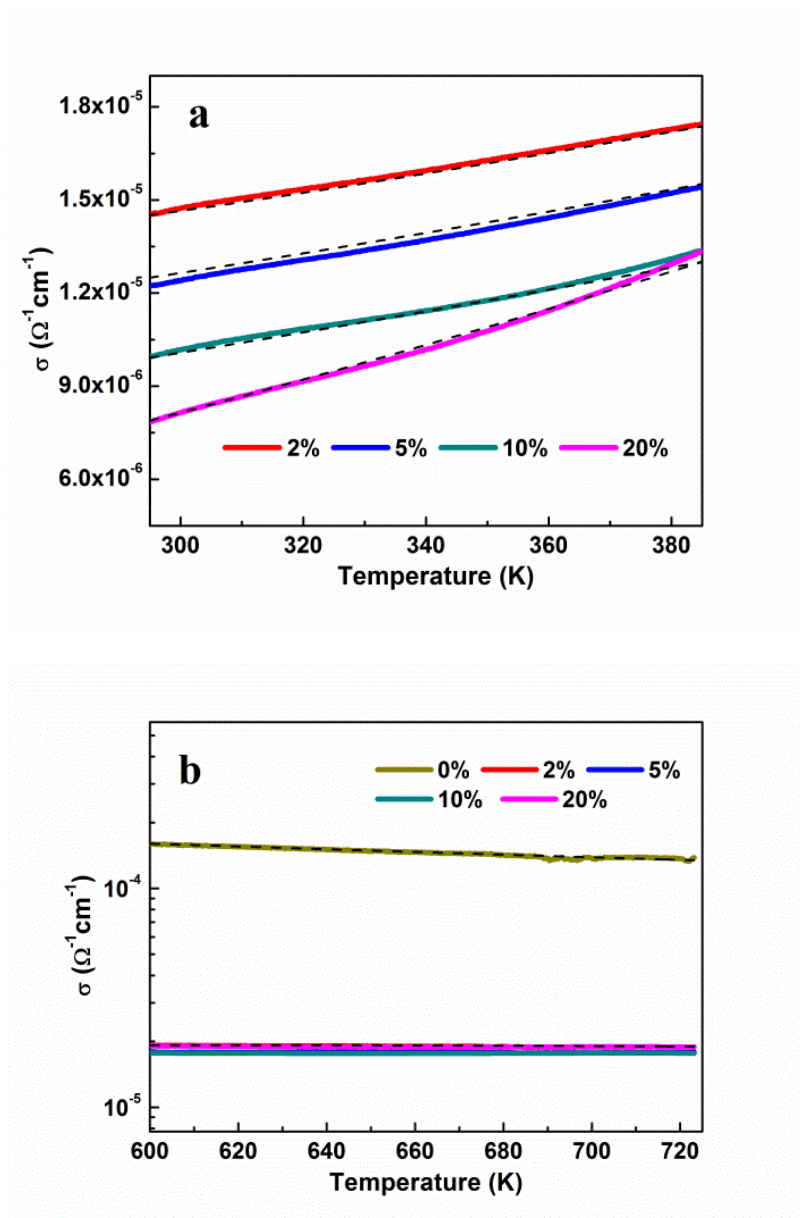

**Figure S5.** The dependence of  $\sigma_{UV}/\sigma_D$  on temperature under different oxygen partial pressures.

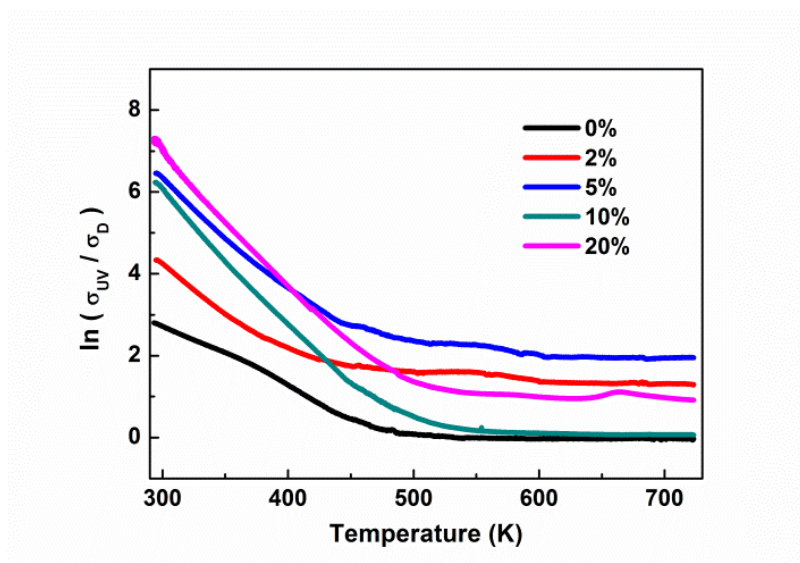

Supplement: c5cp02391b1.pdf [file c5cp02391b1.pdf]
